# Supplementary material
Source: bioRxiv or medRxiv preprint supplement (https://medrxiv.org/highwire/filestream/74068/field_highwire_adjunct_files/1/2020.03.20.20036996-2.pdf)
Supplement: Supplementary file [file 2020.03.20.20036996-2.pdf]

## SUPPLEMENTARY MATERIAL

### FIGURES

*Fig S1. Frequency of cases with confirmatory molecular diagnosis for Ataxia. A. Autosomal Dominant Ataxias. B. Autosomal Recessive Ataxias*

### TABLES

*Table S1. Patients with Autosomal Dominant Ataxias*

| Patient | Sex | Age | AO | Evolution<br>(years) | Family<br>History | Molecular<br>diagnosis | Gene         | Mutation                                                     | Methodology                       |
|---------|-----|-----|----|----------------------|-------------------|------------------------|--------------|--------------------------------------------------------------|-----------------------------------|
| 1       | F   | 39  | 38 | 1                    | Yes               | SCA1                   | <i>ATXN1</i> | Abnormal CAG trinucleotide repeat expansion. (32/54 repeats) | PCR and capillary electrophoresis |
| 2       | F   | 30  | 28 | 2                    | Yes               | SCA1                   | <i>ATXN1</i> | Abnormal CAG trinucleotide repeat expansion (31/48 repeats)  | PCR and capillary electrophoresis |
| 3       | F   | 29  | 29 | 0                    | Yes               | SCA1                   | <i>ATXN1</i> | Abnormal CAG trinucleotide repeat expansion (32/53 repeats)  | PCR and capillary electrophoresis |

|    |   |    |    |    |     |      |              |                                                             |                                   |
|----|---|----|----|----|-----|------|--------------|-------------------------------------------------------------|-----------------------------------|
| 4  | F | 45 | 38 | 7  | Yes | SCA1 | <i>ATXN1</i> | Abnormal CAG trinucleotide repeat expansion (30/50 repeats) | PCR and capillary electrophoresis |
| 5  | M | 39 | 30 | 9  | Yes | SCA1 | <i>ATXN1</i> | Abnormal CAG trinucleotide repeat expansion (30/48 repeats) | PCR and capillary electrophoresis |
| 6  | F | 55 | 49 | 6  | Yes | SCA1 | <i>ATXN1</i> | Abnormal CAG trinucleotide repeat expansion(29/ 43 repeats) | PCR and capillary electrophoresis |
| 7  | M | 40 | 36 | 16 | Yes | SCA1 | <i>ATXN1</i> | Abnormal CAG trinucleotide repeat expansion (30/52 repeats) | PCR and capillary electrophoresis |
| 8  | F | 61 | 45 | 16 | Yes | SCA1 | <i>ATXN1</i> | Abnormal CAG trinucleotide repeat expansion (29/42 repeats) | PCR and capillary electrophoresis |
| 9  | M | 59 | 45 | 14 | Yes | SCA2 | <i>ATXN2</i> | Abnormal CAG trinucleotide repeat expansion (20/38 repeats) | PCR and capillary electrophoresis |
| 10 | M | 30 | 23 | 7  | Yes | SCA2 | <i>ATXN2</i> | Abnormal CAG trinucleotide repeat expansion (22/43 repeats) | PCR and capillary electrophoresis |
| 11 | M | 35 | 22 | 13 | No  | SCA2 | <i>ATXN2</i> | Abnormal CAG trinucleotide repeat expansion(22/43 repeats)  | PCR and capillary electrophoresis |
| 12 | M | 35 | 23 | 12 | Yes | SCA2 | <i>ATXN2</i> | Abnormal CAG trinucleotide repeat expansion (22/43 repeats) | PCR and capillary electrophoresis |

|    |   |    |    |    |     |      |              |                                                                          |                                   |
|----|---|----|----|----|-----|------|--------------|--------------------------------------------------------------------------|-----------------------------------|
| 13 | F | 14 | 13 | 1  | Yes | SCA2 | <i>ATXN2</i> | Abnormal CAG trinucleotide repeat expansion (22/51 repeats)              | PCR and capillary electrophoresis |
| 14 | F | 47 | 40 | 7  | Yes | SCA2 | <i>ATXN2</i> | Abnormal CAG trinucleotide repeat expansion (22/39 repeats)              | PCR and capillary electrophoresis |
| 15 | F | 56 | 40 | 16 | Yes | SCA2 | <i>ATXN2</i> | Abnormal CAG trinucleotide repeat expansion (22/44 repeats)              | PCR and capillary electrophoresis |
| 16 | F | 25 | 23 | 2  | Yes | SCA2 | <i>ATXN2</i> | Abnormal CAG trinucleotide repeat expansion (22/40 repeats)              | PCR and capillary electrophoresis |
| 17 | F | 31 | 25 | 6  | Yes | SCA2 | <i>ATXN2</i> | Abnormal CAG trinucleotide repeat expansion (22/44 repeats)              | PCR and capillary electrophoresis |
| 18 | F | 26 | 11 | 15 | Yes | SCA2 | <i>ATXN2</i> | Abnormal CAG trinucleotide repeat expansion (22/51 repeats)              | PCR and capillary electrophoresis |
| 19 | M | 30 | 19 | 11 | Yes | SCA2 | <i>ATXN2</i> | Abnormal CAG trinucleotide repeat expansion(22/40 repeats)               | PCR and capillary electrophoresis |
| 20 | M | 23 | 10 | 13 | Yes | SCA2 | <i>ATXN2</i> | Expansión anormal de la repetición de trinucleótidos CAG (22/52 repeats) | PCR and capillary electrophoresis |
| 21 | M | 69 | 60 | 9  | Yes | SCA2 | <i>ATXN2</i> | Abnormal CAG trinucleotide repeat expansion (22/37 repeats)              | PCR and capillary electrophoresis |

|    |   |    |    |    |     |      |              |                                                             |                                   |
|----|---|----|----|----|-----|------|--------------|-------------------------------------------------------------|-----------------------------------|
| 22 | M | 51 | 47 | 4  | Yes | SCA2 | <i>ATXN2</i> | Abnormal CAG trinucleotide repeat expansion (22/38 repeats) | PCR and capillary electrophoresis |
| 23 | M | 57 | 50 | 7  | No  | SCA2 | <i>ATXN2</i> | Abnormal CAG trinucleotide repeat expansion (22/40 repeats) | PCR and capillary electrophoresis |
| 24 | M | 21 | 18 | 3  | Yes | SCA2 | <i>ATXN2</i> | Abnormal CAG trinucleotide repeat expansion (22/44 repeats) | PCR and capillary electrophoresis |
| 25 | M | 46 | 18 | 26 | Yes | SCA2 | <i>ATXN2</i> | Abnormal CAG trinucleotide repeat expansion (22/39 repeats) | PCR and capillary electrophoresis |
| 26 | F | 48 | 15 | 3  | Yes | SCA2 | <i>ATXN2</i> | Abnormal CAG trinucleotide repeat expansion (22/39 repeats) | PCR and capillary electrophoresis |
| 27 | F | 25 | 20 | 5  | Yes | SCA2 | <i>ATXN2</i> | Abnormal CAG trinucleotide repeat expansion (22/44 repeats) | PCR and capillary electrophoresis |
| 28 | M | 44 | 30 | 14 | YES | SCA2 | <i>ATXN2</i> | Abnormal CAG trinucleotide repeat expansion (22/44repeats)  | PCR and capillary electrophoresis |
| 29 | M | 45 | 35 | 10 | Yes | SCA3 | <i>ATXN3</i> | Abnormal CAG trinucleotide repeat expansion (23/64 repeats) | PCR and capillary electrophoresis |
| 30 | M | 55 | 51 | 4  | Yes | SCA3 | <i>ATXN3</i> | Abnormal CAG trinucleotide repeat expansion (19/63 repeats) | PCR and capillary electrophoresis |

|    |   |    |    |    |     |      |                |                                                             |                                   |
|----|---|----|----|----|-----|------|----------------|-------------------------------------------------------------|-----------------------------------|
| 31 | F | 34 | 32 | 2  | Yes | SCA3 | <i>ATXN3</i>   | Abnormal CAG trinucleotide repeat expansion (23/71 repeats) | PCR and capillary electrophoresis |
| 32 | F | 32 | 30 | 2  | Yes | SCA3 | <i>ATXN3</i>   | Abnormal CAG trinucleotide repeat expansion (23/71 repeats) | PCR and capillary electrophoresis |
| 33 | F | 48 | 36 | 12 | Yes | SCA3 | <i>ATXN3</i>   | Abnormal CAG trinucleotide repeat expansion (31/62 repeats) | PCR and capillary electrophoresis |
| 34 | M | 51 | 44 | 7  | Yes | SCA3 | <i>ATXN3</i>   | Abnormal CAG trinucleotide repeat expansion (10/62 repeats) | PCR and capillary electrophoresis |
| 35 | M | 65 | 39 | 26 | Yes | SCA3 | <i>ATXN3</i>   | Abnormal CAG trinucleotide repeat expansion (19/62 repeats) | PCR and capillary electrophoresis |
| 36 | M | 56 | 50 | 6  | Yes | SCA3 | <i>ATXN3</i>   | Abnormal CAG trinucleotide repeat expansion (10/63 repeats) | PCR and capillary electrophoresis |
| 37 | M | 33 | 31 | 2  | Yes | SCA3 | <i>ATXN3</i>   | Abnormal CAG trinucleotide repeat expansion (10/67 repeats) | PCR and capillary electrophoresis |
| 38 | F | 53 | 49 | 4  | Yes | SCA3 | <i>ATXN3</i>   | Abnormal CAG trinucleotide repeat expansion (20/66 repeats) | PCR and capillary electrophoresis |
| 39 | F | 66 | 63 | 3  | Yes | SCA6 | <i>CACNA1A</i> | Abnormal CAG trinucleotide repeat expansion (9/20 repeats)  | PCR and capillary electrophoresis |

|    |   |    |    |    |     |                                        |                |                                                             |                                   |
|----|---|----|----|----|-----|----------------------------------------|----------------|-------------------------------------------------------------|-----------------------------------|
| 40 | F | 38 | 34 | 4  | Yes | SCA6                                   | <i>CACNA1A</i> | Abnormal CAG trinucleotide repeat expansion (10/21 repeats) | PCR and capillary electrophoresis |
| 41 | F | 74 | 55 | 15 | Yes | SCA6                                   | <i>CACNA1A</i> | Abnormal CAG trinucleotide repeat expansion (4/21 repeats)  | PCR and capillary electrophoresis |
| 42 | F | 37 | 27 | 10 | Yes | SCA7                                   | <i>ATXN7</i>   | Abnormal CAG trinucleotide repeat expansion (7/66 repeats)  | PCR and capillary electrophoresis |
| 43 | M | 49 | 37 | 19 | Yes | Huntington disease                     | <i>HTT</i>     | Abnormal CAG trinucleotide repeat expansion (20/39 repeats) | PCR and capillary electrophoresis |
| 44 | F | 23 | 20 | 3  | Yes | Huntington disease                     | <i>HTT</i>     | Abnormal CAG trinucleotide repeat expansion (10/62 repeats) | PCR and capillary electrophoresis |
| 45 | F | 40 | 32 | 8  | Yes | Gerstmann-Sträussler Scheinker disease | <i>PRNP</i>    | NM_000311.3:c.305C>T(p.Pro102Leu)                           | PCR and sanger sequencing         |
| 46 | F | 52 | 47 | 6  | Yes | Gerstmann-Sträussler Scheinker disease | <i>PRNP</i>    | NM_000311.3:c.305C>T(p.Pro102Leu)                           | PCR and Sanger sequencing         |
| 47 | F | 28 | 24 | 4  | Yes | Gerstmann-Sträussler Scheinker disease | <i>PRNP</i>    | NM_000311.3:c.305C>T(p.Pro102Leu)                           | PCR and Sanger sequencing         |

|    |   |    |    |    |     |                                                     |               |                                                 |                                      |
|----|---|----|----|----|-----|-----------------------------------------------------|---------------|-------------------------------------------------|--------------------------------------|
| 48 | M | 41 | 37 | 4  | Yes | Gerstmann-Sträussler Scheinker disease              | <i>PRNP</i>   | NM_000311.3:c.350C>T(p.Ala117Val)               | PCR Sanger Sequencing                |
| 49 | F | 51 | 41 | 10 | Yes | SCA28                                               | <i>AFG3L2</i> | NM_006796:c.2114T>C(p.Ille705Thr)               | NGS                                  |
| 50 | M | 5  | 1m | 5  | Yes | Ataxia related to <i>SCNA2</i> gene                 | <i>SCN2A</i>  | NM_021007.2: c.788C>T (p.Ala263Val)             | NGS                                  |
| 51 | F | 2  | <1 | 2  | Yes | Ataxia related to <i>SCNA2</i> gene                 | <i>SCN2A</i>  | NM_021007.2:c.788C>T (p.Ala263Val)              | PCR Sanger Sequencing                |
| 52 | M | 38 | <1 | 38 | Yes | Ataxia related to <i>SCNA2</i> gene                 | <i>SCN2A</i>  | NM_021007.2:c.788C>T (p.Ala263Val)              | PCR Sanger Sequencing                |
| 53 | F | 66 | 19 | 45 | Yes | SCA36                                               | <i>NOP56</i>  | Abnormal hexanucleotide GGCCTG repeat expansion | TP-PCR and capillary electrophoresis |
| 54 | F | 2  | 8m | 1  | No  | Ataxia and epilepsy associated to <i>KCN2A</i> gene | <i>KCN2A</i>  | NM_001204269 c.890G>A (p.Arg297Gln)             | NGS                                  |
| 55 | M | 45 | 44 | 4  | Yes | SCA48                                               | <i>STUB1</i>  | NM_005861.3:c.854C>A (p.Ala285Asp)              | NGS                                  |

---

**NGS:**Next Generation Sequencing **P:** patients **M:** Male **F:**female; **m:**months; **AO:** age at onset in years



**TABLE S2. Eye movement abnormalities in patients with Autosomal Dominant Ataxias**

|                                  | SCA-1<br>(N:8) |   | SCA-2<br>(N:20) |    | SCA-3<br>(N:10) |   | SCA-6<br>(N:3) |   | SCA-7<br>(N:1) |   | SCA 36<br>(N:1) |   | SCA-28<br>(N:1) |   | GSS<br>(N:4) |   | HD<br>(N:2) |   |
|----------------------------------|----------------|---|-----------------|----|-----------------|---|----------------|---|----------------|---|-----------------|---|-----------------|---|--------------|---|-------------|---|
|                                  | H              | V | H               | V  | H               | V | H              | V | H              | V | H               | V | H               | V | H            | V | H           | V |
| <b>Impaired Smooth Pursuit *</b> | 3              | 2 | 7               | 5  | 2               | 1 | -              | - | 1              | 1 | -               | - | 1               | 1 | 2            | 2 | 1           | - |
| <b>Saccades *</b>                |                |   |                 |    |                 |   |                |   |                |   |                 |   |                 |   |              |   |             |   |
| • <b>Prolonged latency</b>       | -              | - | 9               | 5  | 1               | 1 | -              | - | -              | - | -               | - | -               | - | -            | - | 2           | 2 |
| • <b>Slow saccades</b>           | 2              | 1 | 16              | 12 | 3               | 1 | -              | - | -              | - | 1               | 1 | -               | - | 2            | 2 | 2           | 2 |
| • <b>Dysmetria</b>               |                |   |                 |    |                 |   |                |   |                |   |                 |   |                 |   |              |   |             |   |
| • <b>-Hipometric</b>             | 1              | 1 | 5               | 7  | 3               | 2 | -              | - | -              | - | 1               | 1 | -               | - | 2            | 2 | 2           | 1 |
| • <b>-Hipermetric</b>            | 1              | - | 2               | 2  | 2               | 1 | -              | - | -              | - | -               | - | 1               | 1 | -            | - | -           | - |
| <b>Nystagmus *</b>               | -              | - | 4               | 2  | 6               | 1 | 1              | - | 1              | 1 | -               | - | -               | - | -            | 1 | 1           | - |

SCA: Spinocerebellar Ataxia; **H**: Horizontal; **V**: Vertical; **N**: Number of patients of each subtype of SCA; **HD**: Huntington disease. **GSS**: Gerstmann-Sträussler Scheinker disease; \* Number of affected patients

**TABLE S3** Extra-cerebellar manifestations in patients with Autosomal Dominant Ataxias.

| <i>Type of Ataxia</i>       | <b>SCA-1</b><br><b>(N:8)</b> | <b>SCA-2</b><br><b>(N:20)</b> | <b>SCA-3</b><br><b>(N:10)</b> | <b>SCA-6</b><br><b>(N:3)</b> | <b>SCA-7</b><br><b>(N:1)</b> | <b>HD</b><br><b>(N:2)</b> | <b>GSS</b><br><b>(N:4)</b> | <b>SCA36</b><br><b>(N:1)</b> | <b>SCA-28</b><br><b>(N:1)</b> |
|-----------------------------|------------------------------|-------------------------------|-------------------------------|------------------------------|------------------------------|---------------------------|----------------------------|------------------------------|-------------------------------|
| <b>Visual loss</b>          | -                            | -                             | -                             | -                            | 1                            | -                         | -                          | -                            | -                             |
| <b>Pyramidal Signs</b>      | 4                            | 4                             | 3                             | 1                            | -                            | -                         | 2                          | -                            | 1                             |
| <b>Polyneuropathy</b>       | -                            | 3                             | 6                             | -                            | -                            | -                         | 1                          | -                            | -                             |
| <b>Dystonia</b>             | -                            | -                             | 2                             | -                            | -                            | -                         | -                          | -                            | -                             |
| <b>Parkinsonism</b>         | 1                            | 6                             | 5                             | 1                            | -                            | 1                         | -                          | -                            | -                             |
| <b>Myoclonus</b>            | -                            | 2                             | 1                             | -                            | -                            | -                         | 1                          | -                            | -                             |
| <b>Chorea</b>               | -                            | -                             | -                             | -                            | -                            | -                         | -                          | -                            | -                             |
| <b>Cognitive impairment</b> | -                            | -                             | -                             | -                            | -                            | 1                         | 1                          | -                            | -                             |

**SCA:** Spinocerebellar Ataxia; **HD:** Huntington Disease; **GSS:** Gerstmann Straussler Scheinker Disease . **N:** Number of patients affected

*Table S4. Patients with Confirmatory molecular diagnosis for Autosomal Recessive Ataxia*

| N  | Gender | Age | Age onset | Disease Progression (in years) | Family history | Molecular Diagnostic | Gene       | Mutation                                    |
|----|--------|-----|-----------|--------------------------------|----------------|----------------------|------------|---------------------------------------------|
| 1  | M      | 26  | 12        | 14                             | Yes            | Friedreich Ataxia    | <i>FXN</i> | Abnormal GAA trinucleotide repeat expansion |
| 2  | M      | 23  | 12        | 11                             | Yes            | Friedreich Ataxia    | <i>FXN</i> | Abnormal GAA trinucleotide repeat expansion |
| 3  | M      | 22  | 16        | 6                              | Yes            | Friedreich Ataxia    | <i>FXN</i> | Abnormal GAA trinucleotide repeat expansion |
| 4  | F      | 14  | 8         | 6                              | No             | Friedreich Ataxia    | <i>FXN</i> | Abnormal GAA trinucleotide repeat expansion |
| 5  | M      | 22  | 5         | 17                             | No             | Friedreich Ataxia    | <i>FXN</i> | Abnormal GAA trinucleotide repeat expansion |
| 6  | F      | 36  | 17        | 19                             | No             | Friedreich Ataxia    | <i>FXN</i> | Abnormal GAA trinucleotide repeat expansion |
| 7  | F      | 75  | 20        | 55                             | Yes            | Friedreich Ataxia    | <i>FXN</i> | Abnormal GAA trinucleotide repeat expansion |
| 8  | M      | 18  | 14        | 4                              | No             | Friedreich Ataxia    | <i>FXN</i> | Abnormal GAA trinucleotide repeat expansion |
| 9  | F      | 37  | 13        | 24                             | Yes            | Friedreich Ataxia    | <i>FXN</i> | Abnormal GAA trinucleotide repeat expansion |
| 10 | M      | 32  | 23        | 9                              | No             | Friedreich Ataxia    | <i>FXN</i> | Abnormal GAA trinucleotide repeat expansion |
| 11 | M      | 48  | 17        | 31                             | Yes            | Friedreich Ataxia    | <i>FXN</i> | Abnormal GAA trinucleotide repeat expansion |
| 12 | F      | 26  | 5         | 11                             | No             | Friedreich Ataxia    | <i>FXN</i> | Abnormal GAA trinucleotide repeat expansion |

|    |   |    |    |    |     |                   |            |                                                                                   |
|----|---|----|----|----|-----|-------------------|------------|-----------------------------------------------------------------------------------|
| 13 | M | 20 | 12 | 8  | Yes | Friedreich Ataxia | <i>FXN</i> | Abnormal GAA trinucleotide repeat expansion                                       |
| 14 | M | 49 | 16 | 33 | Yes | Friedreich Ataxia | <i>FXN</i> | Abnormal GAA trinucleotide repeat expansion                                       |
| 15 | M | 45 | 17 | 28 | Yes | Friedreich Ataxia | <i>FXN</i> | Abnormal GAA trinucleotide repeat expansion                                       |
| 16 | M | 30 | 5  | 25 | No  | Friedreich Ataxia | <i>FXN</i> | Abnormal GAA trinucleotide repeat expansion                                       |
| 17 | F | 47 | 16 | 31 | Yes | Friedreich Ataxia | <i>FXN</i> | Abnormal GAA trinucleotide repeat expansion                                       |
| 18 | M | 48 | 18 | 30 | No  | Friedreich Ataxia | <i>FXN</i> | Abnormal GAA trinucleotide repeat expansion<br>NM_000144.4:c.354C>G;(p.Tyr118Ter) |
| 19 | F | 21 | 11 | 10 | No  | Friedreich Ataxia | <i>FXN</i> | Abnormal GAA trinucleotide repeat expansion                                       |
| 20 | M | 64 | 11 | 53 | Yes | Friedreich Ataxia | <i>FXN</i> | Abnormal GAA trinucleotide repeat expansion                                       |
| 21 | M | 16 | 14 | 2  | Yes | Friedreich Ataxia | <i>FXN</i> | Abnormal GAA trinucleotide repeat expansion                                       |
| 22 | F | 20 | 14 | 6  | Yes | Friedreich Ataxia | <i>FXN</i> | Abnormal GAA trinucleotide repeat expansion                                       |
| 23 | M | 19 | 9  | 10 | Yes | Friedreich Ataxia | <i>FXN</i> | Abnormal GAA trinucleotide repeat expansion                                       |
| 24 | F | 14 | 13 | 1  | Yes | Friedreich Ataxia | <i>FXN</i> | Abnormal GAA trinucleotide repeat expansion                                       |
| 25 | M | 45 | 17 | 28 | NO  | Friedreich Ataxia | <i>FXN</i> | Abnormal GAA trinucleotide repeat expansion                                       |
| 26 | F | 39 | 30 | 9  | NO  | Friedreich Ataxia | <i>FXN</i> | Abnormal GAA trinucleotide repeat expansion                                       |
| 27 | M | 16 | 2  | 13 | Yes | Friedreich Ataxia | <i>FXN</i> | Abnormal GAA trinucleotide repeat expansion                                       |

|    |   |    |    |    |     |                                       |             |                                                                              |
|----|---|----|----|----|-----|---------------------------------------|-------------|------------------------------------------------------------------------------|
| 28 | F | 11 | 5  | 6  | Yes | Friedreich Ataxia                     | <i>FXN</i>  | Abnormal GAA trinucleotide repeat expansion                                  |
| 29 | F | 45 | 12 | 33 | No  | Friedreich Ataxia                     | <i>FXN</i>  | Abnormal GAA trinucleotide repeat expansion                                  |
| 30 | F | 23 | 15 | 8  | No  | Friedreich Ataxia                     | <i>FXN</i>  | Abnormal GAA trinucleotide repeat expansion                                  |
| 31 | M | 25 | 22 | 3  | Yes | Friedreich Ataxia                     | <i>FXN</i>  | Abnormal GAA trinucleotide repeat expansion                                  |
| 32 | F | 21 | 17 | 4  | No  | Friedreich Ataxia                     | <i>FXN</i>  | Abnormal GAA trinucleotide repeat expansion                                  |
| 33 | M | 12 | 9  | 3  | No  | Friedreich Ataxia                     | <i>FXN</i>  | Abnormal GAA trinucleotide repeat expansion                                  |
| 34 | M | 32 | 24 | 8  | No  | Friedreich Ataxia                     | <i>FXN</i>  | Abnormal GAA trinucleotide repeat expansion                                  |
| 35 | F | 18 | 17 | 1  | Yes | Friedreich Ataxia                     | <i>FXN</i>  | Abnormal GAA trinucleotide repeat expansion                                  |
| 36 | M | 20 | 16 | 3  | Yes | Friedreich Ataxia                     | <i>FXN</i>  | Abnormal GAA trinucleotide repeat expansion                                  |
| 37 | F | 29 | 21 | 8  | No  | Niemann Pick-C disease                | <i>NPCI</i> | NM_000271.4: c.2872C>T;(p.Arg958Ter)                                         |
| 38 | F | 36 | 33 | 3  | Yes | Niemann Pick-C disease                | <i>NPCI</i> | NM_000271.5:c.1552C>T,(p.Arg518Trp )<br>NM_000271.5:c.3019C>G,(p.Pro1007Ala) |
| 39 | M | 41 | 10 | 31 | Yes | Niemann Pick-C disease                | <i>NPCI</i> | NM_000271.5:c.1552C>T,(p.Arg518Trp )<br>NM_000271.5:c.3019C>G,(p.Pro1007Ala) |
| 40 | M | 41 | 30 | 10 | Yes | Niemann Pick-C disease                | <i>NPCI</i> | NM_000271.5:c.1552C>T,(p.Arg518Trp )<br>NM_000271.5:c.3019C>G,(p.Pro1007Ala) |
| 41 | M | 11 | 1  | 11 | Yes | Ataxia with oculomotor apraxia type 1 | <i>APTX</i> | NM_175069.1:c.879G>A;( p.Ter293=)                                            |
| 42 | F | 12 | 4  | 4  | Yes | Ataxia with oculomotor apraxia type 1 | <i>APTX</i> | NM_175069.1:c.879G>A;( p.Ter293=)                                            |

|    |   |    |         |    |     |                                                               |                |                                                                                                                           |
|----|---|----|---------|----|-----|---------------------------------------------------------------|----------------|---------------------------------------------------------------------------------------------------------------------------|
| 43 | M | 19 | 11      | 8  | NO  | Ataxia with oculomotor apraxia type 2                         | <i>SEXT</i>    | NM_001351527:c.7154T>G;(p.Val2385Gly) ; NM_001351527.1:c.15_17delTTG (p.Cys5del)                                          |
| 44 | F | 26 | 15      | 11 | NO  | Ataxia with oculomotor apraxia type 2                         | <i>SEXT</i>    | NM_001351527:c.1856_1863del;p.Asn620Rfs*4 ; NM_001351527.1:c.15_17delTTG (p.Cys5del)/NM_001351527:c.15_17del:p.C5Wfs*2673 |
| 45 | M | 21 | 5       | 16 | No  | Cerebrotendinous xanthomatosis                                | <i>CYP27A1</i> | NM_000784.3:c.1213C>T(p.Arg 405Trp)                                                                                       |
| 46 | M | 24 | 17      | 7  | NO  | Spinocerebellar ataxia autosomal recessive type 16 (SCAR16)   | <i>STUB1</i>   | NM_005861·2:c.612+1G>C NM_005861·2:c.823C>G (p.Leu275Val)                                                                 |
| 47 | M | 29 | 19      | 10 | Yes | Action myoclonus–renal failure syndrome                       | <i>SCARB2</i>  | NM_005506:c.704+1G>A                                                                                                      |
| 48 | M | 26 | 24      | 2  | Yes | Action myoclonus–renal failure syndrome                       | <i>SCARB2</i>  | NM_005506:c.704+1G>A                                                                                                      |
| 49 | F | 32 | 2       | 30 | Yes | Recessive Ataxia secondary to biallelic OPA1 mutations (OPA1) | <i>OPA1</i>    | NM_015560: c.267G>T(p.Trp89Cys)NM_015560: c.635_636delAA (p.Lys212ArgfsTer4)                                              |
| 50 | F | 31 | 2       | 29 | Yes | Recessive Ataxia secondary to biallelic OPA1 mutations (OPA1) | <i>OPA1</i>    | NM_015560: c.267G>T(p.Trp89Cys);<br>NM_015560: c.635_636delAA(p.Lys212ArgfsTer4)                                          |
| 51 | M | 4  | <1 Year | 4  | Yes | Joubert Syndrome                                              | <i>CC2D2A</i>  | NM_001080522: c.4667A>T (p.Asp1556Val);<br>NM_001080522:c.3289delG(p.Val1097PhefsTer2)                                    |
| 52 | M | 7  | 7 m     | 7  | No  | Ataxia Telangiectasia                                         | <i>ATM</i>     | NM_000051.3:c.6374 A>G (p.His2125Arg); NM_000051.3:c.2922-1G>A.                                                           |

|    |   |    |      |    |     |                                                             |               |                                                                                           |
|----|---|----|------|----|-----|-------------------------------------------------------------|---------------|-------------------------------------------------------------------------------------------|
| 53 | M | 6  | 18 m | 4  | No  | Ataxia Telangiectasia                                       | <i>ATM</i>    | NM_000051.3:c.614T>G (Leu205Ter);<br>NM_000051.3 c.8827_8828delAC (p.Thr2473GlyfsTer3)    |
| 54 | F | 22 | 5    | 17 | No  | Ataxia Telangiectasia                                       | <i>ATM</i>    | NM_000051.3:c.1373G>A(p.Cys458Tyr); NM_000051:c.8785_8786delAGGT<br>(p.Arg2929MetfsTfs*2) |
| 55 | M | 24 | 2    | 22 | No  | Autosomal recessive spastic ataxia of Charlevoix-Saguenay   | <i>SACS</i>   | NM_001278055:c.4492C>T (p.Arg1498Ter);<br>NM_001278055: c.2388dupA (p.Leu797IlefsTer5)    |
| 56 | M | 40 | 19   | 21 | Yes | Autosomal recessive cerebellar ataxia type 1 (ARCA1)        | <i>SYNE 1</i> | NM_033071.3: c.20314delC(p.Leu6772TrpfsTer13);<br>NM_O33071.3: c.1980G>A; p.(Trp660Ter)   |
| 57 | M | 37 | 22   | 15 | Yes | Autosomal recessive cerebellar ataxia type 1 (ARCA1)        | <i>SYNE 1</i> | NM_033071.3: c.20314del;p.Leu6772Trpfs*13; NM_O33071.3: c.1980G>A;<br>p.(Trp660Ter)       |
| 58 | M | 17 | 7    | 10 | No  | CLN2/Spinocerebellar ataxia autosomal recessive type SCAR 7 | <i>TPP1</i>   | NM_000391: exon7:c.827A>T(p.Asp276Val);<br>NM_000391.3:c.887-10A>G                        |

NGS:Next Generation Sequencing **P**: patients **M**: Male **F**:female





|                           |    |   |   |   |   |   |   |   |   |   |   |   |   |   |   |   |   |
|---------------------------|----|---|---|---|---|---|---|---|---|---|---|---|---|---|---|---|---|
| <b>Nistagmus</b>          | 10 | 2 | - | - | 2 | 1 | - | - | - | - | 1 | - | 2 | - | - | - | - |
| <b>Oculomotor Apraxia</b> | -  | - | - | - | 1 | - | - | - | - | - | - | - | - | - | - | - | - |
| <b>Macro Square-Waves</b> | 15 | - | - | - | - | - | - | - | - | - | - | - | - | - | - | - | - |

**FA:** Friedreich's Ataxia, **AOA:** Ataxia with Oculomotor Apraxia **SJ:** Joubert Syndrome, **SMA-IR:** Action myoclonus-Renal Failure Syndrome **SCAR16: Spinocerebellar** Ataxia Autosomal recessive type 16: NPC: Niemann Pick type C disease ; **OPA:** Recessive Ataxia Secondary to biallelic OPA1 mutations; **AT:** Ataxia Telangiectasia, **ARSACS:** Autosomal Recessive Spastic Ataxia of Charlevoix – Saguenay; **H:** Horizontal; **V:** Vertical; **N:** Number of patients of each subtype of recessive ataxia; \* Number of affected patients.

**TABLE S7. Use of Next generation sequencing (NGS) techniques in the study of ataxic patients**

|                                                              |             |
|--------------------------------------------------------------|-------------|
| <b>Total of patients who were analyzed by NGS Techniques</b> | <b>26</b>   |
| Total number of confirmatory molecular diagnosis             | 17/26 (65%) |
| Patients who were diagnosed by multigenic panel testing      | 10/14       |
| Patients who were diagnosed by WES                           | 6/11        |
| Patients who were diagnosed by WGS                           | 1/1         |

**WES:** Whole exome sequencing; **WGS:** Whole genome sequencing
